# Supplementary material for: Early Response to Dehydration Six-Like Transporter Family: Early Origin in Streptophytes and Evolution in Land Plants
Source: Frontiers journal article supplement (doi:10.3389/fpls.2021.681929), 2021-09-06
Supplement: Data_Sheet_2.zip [file Data_Sheet_2.zip]

## Sheet: Supp data 1
SUPPEMENTARY Table 1 : Early Response to Dehydration Six-Like (ESL) genes identified in this study
Species	Abb.	Genome ID	Database	Number of sequences	Nb of tandem duplications	Sequence ID		Exon Number	Structure Type	ESL1	ESL2	ESL2a	ESL2b	ESL3a	ESL3b	ESL3c
Amborella trichopoda	Atr	V1.0	Phytozome V10.0	5	2	evm_27.model.AmTr_v1.0_scaffold00011.167		18		ESL1
						evm_27.model.AmTr_v1.0_scaffold00019.449		18			ESL2
						evm_27.model.AmTr_v1.0_scaffold00019.451		18			ESL2
						evm_27.model.AmTr_v1.0_scaffold00019.454		14			ESL2
						evm_27.model.AmTr_v1.0_scaffold00103.38		18			ESL2
Aquilegia coerulea	Ac	V1.1	Phytozome V10.0	7	4	Aquca_007_00225 / Aqcoe5G190100.1		18		ESL1
		V3.1				Aquca_010_00507 / Aqcoe6G121100.1		18		ESL1
						Aquca_017_00357 / Aqcoe5G067200.1		15				ESL2a
						Aquca_017_00358 / Aqcoe5G067100.1		18				ESL2a
						Aquca_026_00082 / Aqcoe2G321300.1		18						ESL3a
						Aquca_026_00083 / Aqcoe2G321200.1		18				ESL2a
						Aquca_026_00097 / Aqcoe2G319500.1		18					ESL2b
Arabidopsis halleri	Ah	V1.1	Phytozome V10.0	14	7	Araha.1433s0002		18	Type 1						ESL3b
						Araha.28364s0001		18	Type 1					ESL3a
						Araha.3226s0005		17	Type 5							ESL3c
						Araha.32703s0010		17	Type 6							ESL3c
						Araha.32703s0011		17	Type 7							ESL3c
						Araha.4425s0002		6					ESL2b
						Araha.4531s0007		18	Type 1							ESL3c
						Araha.4531s0008		17	Type 5							ESL3c
						Araha.4531s0009		17	Type 3			ESL2a
						Araha.49879s0001		17	Type 3	ESL1
						Araha.5150s0020		18	Type 1							ESL3c
						Araha.5150s0021		17	17 ou Type 1							ESL3c
						Araha.6366s0002		17	Type 5			ESL2a
						Araha.67621s0001		17	Type 4	ESL1
Arabidopsis lyrata	Al	V1.0	Phytozome V10.0	19	9	Al474748	-	18	Type 1					ESL3a
		V2.1				Al894704	-	18	Type 1							ESL3c
						Al470961	AL1G19320	18	Type 1							ESL3c
						Al470964	AL1G19330	18	Type 1							ESL3c
						Al470966	AL1G19350	17	Type 7							ESL3c
						Al919640	AL1G19360	17	Type 6							ESL3c
						Al472174	AL1G32200	17	Type 4	ESL1
						Al497320	AL219U10010	17	Type 3						ESL3b
						Al926902	AL2G35130	17	Type 3	ESL1
						Al477798	AL3G15540	17	Type 3			ESL2a
						Al340683	AL3G15550	17	Type 5							ESL3c
						Al477802	AL3G15580	18	Type 1							ESL3c
						Al477829	AL3G15950	17	Type 5							ESL3c
						Al929974	AL3G34180	17	Type 3						ESL3b
						Al483991	AL4G47620	17	Type 5			ESL2a
						Al488771	AL6G30200	16	Type 9				ESL2b
						Al326968	AL6G39700	18	Type 1							ESL3c
						Al895543	AL6G48240	18	Type 1						ESL3b
						Al490113	AL6G48250	18	Type 1						ESL3b
Arabidopsis thaliana	At	TAIR10	Aramemnon	19	12	At1g08890		18	Type 1							ESL3c
						At1g08900		18	Type 1							ESL3c
						At1g08920		17	Type 7							ESL3c
						At1g08930		17	Type 6							ESL3c
						At1g19450		17	Type 4	ESL1
						At1g54730		18	Type 1					ESL3a
						At1g75220		17	Type 3	ESL1
						At2g48020		16				ESL2a
						At3g05150		17	Type 3			ESL2a
						At3g05155		13								ESL3c
						At3g05160		18	Type 1							ESL3c
						At3g05165		18	Type 1							ESL3c
						At3g05400		17	Type 5							ESL3c
						At3g20460		17	Type 3						ESL3b
						At4g04750		18	Type 1						ESL3b
						At4g04760		18	Type 1						ESL3b
						At5g18840		16	Type 9				ESL2b
						At5g27350		18	Type 1							ESL3c
						At5g27360		18	Type 1							ESL3c
Brachypodium distachyon	Bd		Aramemnon	7	4	Bradi1g61750		18			ESL2
						Bradi1g61757		15			ESL2
						Bradi2g14900		17		ESL1
						Bradi2g16070		17		ESL1
						Bradi2g16100		17		ESL1
						Bradi4g11680		17			ESL2
						Bradi5g02520		18						ESL3a
Brassica rapa	Br	V1.3	Phytozome V10.0	30	12	Brara.A02276		18	Type 1					ESL3a
						Brara.A03742		17	Type 5							ESL3c
						Brara.B02151		17	Type 3	ESL1
						Brara.B02653		18	Type 1						ESL3b
						Brara.B03534		17								ESL3c
						Brara.B03536		17	Type 6							ESL3c
						Brara.B03538		18	Type 1							ESL3c
						Brara.C02738		18	Type 1						ESL3b
						Brara.E02158		17	Type 3						ESL3b
						Brara.E02160		17	Type 3						ESL3b
						Brara.E03369		17	Type 5							ESL3c
						Brara.E03407		18								ESL3c
						Brara.E03408		18	Type 1							ESL3c
						Brara.F00562		17								ESL3c
						Brara.F00564		17	Type 7							ESL3c
						Brara.F00565		18	Type 1							ESL3c
						Brara.F01377		17	Type 4	ESL1
						Brara.F02871		18	Type 1							ESL3c
						Brara.G00156		17	Type 5			ESL2a
						Brara.G01147		17	Type 5			ESL2a
						Brara.G02233		17	Type 3	ESL1
						Brara.G03336		17	Type 3	ESL1
						Brara.H02852		18	Type 1							ESL3c
						Brara.H02853		17	Type 7							ESL3c
						Brara.I01709		18	Type 1							ESL3c
						Brara.I02205		17							ESL3b
						Brara.I04735		17	Type 4	ESL1
						Brara.I05286		18	Type 1							ESL3c
						Brara.I05287		17	Type 7							ESL3c
						Brara.J01693		16	Type 9				ESL2b
Capsella rubella	Cr	V1.0	Phytozome V10.0	17	8	Carubv10000842m		16	Type 9				ESL2b
						Carubv10000845m		18	Type 1						ESL3b
						Carubv10000857m		18	Type 1							ESL3c
						Carubv10000868m		18	Type 1						ESL3b
						Carubv10002998m		18	Type 1						ESL3b
						Carubv10003384m		18	Type 1							ESL3c
						Carubv10010993m		17	Type 7							ESL3c
						Carubv10012080m		17	Type 4	ESL1
						Carubv10012279m		18	Type 1							ESL3c
						Carubv10013527m		18	Type 1							ESL3c
						Carubv10013612m		17	Type 3						ESL3b
						Carubv10015164m		17	Type 3			ESL2a
						Carubv10015470m		16								ESL3c
						Carubv10015811m		13								ESL3c
						Carubv10020200m		17		ESL1
						Carubv10021344m		11								ESL3c
						Carubv10022354m		18	Type 1					ESL3a
Carica papaya	Cp	V0.4	Phytozome V10.0	11	4	evm.model.supercontig_1088.2		10								ESL3c
						evm.model.supercontig_1088.3		18								ESL3c
						evm.model.supercontig_447.2		18					ESL2b
						evm.model.supercontig_48.1		17								ESL3c
						evm.model.supercontig_48.2		18						ESL3a
						evm.model.supercontig_6.119		16		ESL1
						evm.model.supercontig_84.123		17				ESL2a
						evm.model.supercontig_9.137		18				ESL2a
						evm.model.supercontig_925.1		18		ESL1
						evm.TU.contig_31100.1		9								ESL3c
						evm.TU.contig_37821.1		10							ESL3b
Cicer arietinum	Ca		NCBI	7	0	gi|502153237|ref|XP_004509267	LOC101490334	18		ESL1
						gi|502161145|ref|XP_004512048	LOC101503030	18		ESL1
						gi|502078858|ref|XP_004486078	LOC101503234	18					ESL2b
						gi|502151198|ref|XP_004508324	LOC101510416	18					ESL2b
						gi|502113427|ref|XP_004494647	LOC101513585	18						ESL3a
						gi|502126054|ref|XP_004499162	LOC101514914	17		ESL1
						gi|502109384|ref|XP_004493632		18				ESL2a
Citrus clementina	Cc	V1.0	Phytozome V10.0	12	6	Ciclev10000960m		18								ESL3c
		V1.1				Ciclev10000980m		18								ESL3c
						Ciclev10001032m		18						ESL3a
						Ciclev10001263m		15								ESL3c
						Ciclev10001562m		15		ESL1
						Ciclev10003224m		16								ESL3c
						Ciclev10003870m		17								ESL3c
						Ciclev10004839m		16					ESL2b
						Ciclev10019918m		17				ESL2a
						Ciclev10019923m		17				ESL2a
						Ciclev10024572m		11				ESL2a
						Ciclev10025481m		18		ESL1
Citrus sinensis	Csi	V1.1	Phytozome V10.0	9	2	orange1.1g011388m		18		ESL1
						orange1.1g011470m		18		ESL1
						orange1.1g011565m		17				ESL2a
						orange1.1g011956m		18						ESL3a
						orange1.1g018767m		13					ESL2b
						orange1.1g019756m		11								ESL3c
						orange1.1g035493m		14								ESL3c
						orange1.1g042030m		12								ESL3c
						orange1.1g048699m		12								ESL3c
Cucumis melo	Cm		Aramemnon	7	2	MELO3C003830		18		ESL1
						MELO3C006595		10					ESL2b
						MELO3C010946		18		ESL1
						MELO3C014417		18				ESL2a
						MELO3C015349		8						ESL3a
						MELO3C015350		17						ESL3a
						MELO3C021377		11					ESL2b
Cucumis sativus	Csa	V1.0	Phytozome V10.0	7	2	Cucsa.163630		17						ESL3a
		V1.1				Cucsa.163640		18						ESL3a
						Cucsa.184350		18				ESL2a
						Cucsa.232130		18		ESL1
						Cucsa.253700		18					ESL2b
						Cucsa.342370		18		ESL1
						Cucsa.363370		15					ESL2b
Eucalyptus grandis	Eg	V2.0	Phytozome V10.0	37	25	Eucgr.B02013		18						ESL3a
						Eucgr.B02014		18						ESL3a
						Eucgr.B02015		16								ESL3c
						Eucgr.B02016		18								ESL3c
						Eucgr.B02017		16								ESL3c
						Eucgr.B02018		17								ESL3c
						Eucgr.B02019		16								ESL3c
						Eucgr.B02020		18								ESL3c
						Eucgr.B02021		18								ESL3c
						Eucgr.B02023		18								ESL3c
						Eucgr.B02024		19								ESL3c
						Eucgr.B02025		17								ESL3c
						Eucgr.B02026		18								ESL3c
						Eucgr.D01063		16								ESL3c
						Eucgr.D01064		13								ESL3c
						Eucgr.D01065		17								ESL3c
						Eucgr.D01066		17								ESL3c
						Eucgr.F01571		18		ESL1
						Eucgr.F01888		18		ESL1
						Eucgr.H01278		18		ESL1
						Eucgr.H01551		16				ESL2a
						Eucgr.H01560		18				ESL2a
						Eucgr.H01565		12				ESL2a
						Eucgr.H01571		18				ESL2a
						Eucgr.H01584		12				ESL2a
						Eucgr.H01593		11				ESL2a
						Eucgr.H01597		10				ESL2a
						Eucgr.H01602		18				ESL2a
						Eucgr.H04438		18							ESL3b
						Eucgr.H04439		18							ESL3b
						Eucgr.H04440		16							ESL3b
						Eucgr.H04441		18							ESL3b
						Eucgr.I02436		16		ESL1
						Eucgr.I02437		13		ESL1
						Eucgr.I02438		19		ESL1
						Eucgr.I02439		18		ESL1
						Eucgr.L01459		12							ESL3b
Genlisea aurea	Ga		NCBI	6	nd	gi|527187513|gb|EPS59997 /AUSU01007909.1	contig_14697	16				ESL2a
						gi|527191008|gb|EPS62019.1/ AUSU01006443.1	contig_10706	18		ESL1
						gi|527191859|gb|EPS62514.1 / AUSU01006089.1	contig_9932	12		ESL1
						gi|527193144|gb|EPS63288.1 / AUSU01005579.1	contig_8892	10					ESL2b
						gi|527203935|gb|EPS70247.1 / AUSU01001759.1	contig_2478	14		ESL1
						gi|527204510|gb|EPS70659.1 / AUSU01001596.1	contig_2216	17		ESL1
Glycine max	Gm	V1.0	Phytozome V10.0	19	10	Glyma02g06280 / 02G056200		18		ESL1
		Wm82.a2.v1				Glyma02g06291 / 02G056300		18		ESL1
						Glyma03g30550 / GM3G1492????		18				ESL2a
						Glyma03g40100 / 03G241000		18						ESL3a
						Glyma03g40121 /		13						ESL3a
						Glyma03g40160 / 03G241500		18						ESL3a
						Glyma07g38275 / 07G252800		18					ESL2b
						Glyma13g28440 / 13G213200		20					ESL2b
						Glyma13g28450 / 13G213300		18					ESL2b
						Glyma14g08070 / 14G074100		18		ESL1
						Glyma15g10630 / 15G099500		18					ESL2b
						Glyma16g25310 / 16G138800		18		ESL1
						Glyma16g25320 / 16G138900		18		ESL1
						Glyma17g02461 / 17G021600		14					ESL2b
						Glyma17g36950 / 17G251100		18		ESL1
						Glyma19g33480 / 19G152400		18				ESL2a
						Glyma19g42690 / 19G238500		18						ESL3a
						Glyma19g42710 / 19G238700		19						ESL3a
						Glyma19g42740 / 19G239000		18						ESL3a
Gossypium raimondii	Gr	V2.1	Phytozome V10.0	19	9	Gorai.004G054600		17					ESL2b
						Gorai.004G084300		18				ESL2a
						Gorai.005G056400		18					ESL2b
						Gorai.005G108100		18		ESL1
						Gorai.007G050600		18		ESL1
						Gorai.007G202700		19		ESL1
						Gorai.007G292200		14							ESL3b
						Gorai.007G292300		18							ESL3b
						Gorai.007G292400		16							ESL3b
						Gorai.007G292500		18							ESL3b
						Gorai.007G292700		18							ESL3b
						Gorai.007G292900		14							ESL3b
						Gorai.007G293000		18							ESL3b
						Gorai.007G293100		18								ESL3c
						Gorai.007G293200		18						ESL3a
						Gorai.008G006300		18				ESL2a
						Gorai.010G009900		18		ESL1
						Gorai.011G183500		18					ESL2b
						Gorai.013G203800		16				ESL2a
Linum usitatissimum	Lu	V1.0	Phytozome V10.0	30	19	Lus10000924		14							ESL3b
						Lus10001656		17		ESL1
						Lus10002534		17		ESL1
						Lus10008179		14				ESL2a
						Lus10008182		12				ESL2a
						Lus10008183		13				ESL2a
						Lus10008184		14				ESL2a
						Lus10012780		15					ESL2b
						Lus10018957		17							ESL3b
						Lus10027975		24				ESL2a
						Lus10027976		12				ESL2a
						Lus10028303		18		ESL1
						Lus10029629		16				ESL2a
						Lus10029960		17								ESL3c
						Lus10029961		19								ESL3c
						Lus10029962		15								ESL3c
						Lus10029963		13								ESL3c
						Lus10029964		15								ESL3c
						Lus10029965		8								ESL3c
						Lus10029966		14						ESL3a
						Lus10033795		17							ESL3b
						Lus10033812		16								ESL3c
						Lus10033814		16								ESL3c
						Lus10033815		16							ESL3b
						Lus10033995		10					ESL2b
						Lus10035354		16						ESL3a
						Lus10035355		12								ESL3c
						Lus10035356		16								ESL3c
						Lus10041748		18		ESL1
						Lus10042676		15				ESL2a
Lotus japonicus	Lj		Kazusa	4	nd	chr1.CM0544.700.r2.m								ESL3a
						chr4.CM0387.140.r2.m							ESL2b
						chr4.CM0165.1020.r2.m				ESL1
						chr6.CM0139.1770.r2.m							ESL2b
Malus domestica	Md	V1.0	Phytozome V10.0	11	3	MDP0000149427		35				ESL2a
						MDP0000163468		16		ESL1
						MDP0000180800		19						ESL3a
						MDP0000204437		18						ESL3a
						MDP0000231242		17				ESL2a
						MDP0000282889		15					ESL2b
						MDP0000293785		16						ESL3a
						MDP0000299992		16						ESL3a
						MDP0000319833		31				ESL2a
						MDP0000325761		17				ESL2a
						MDP0000341008		18		ESL1
Manihot esculenta	Me	V4.1	Phytozome V10.0	14	6	cassava4.1_006352m / 09G162300.1	09G162300.1	18								ESL3c
		V6.1				cassava4.1_006443m / 05G158900.1	05G158900.1	18		ESL1
						cassava4.1_006464m / 15G019200.1	15G019200.1	17					ESL2b
						cassava4.1_006483m / 09G162400.1	09G162400.1	18						ESL3a
						cassava4.1_006494m / 08G124000.1	08G124000.1	18						ESL3a
						cassava4.1_006507m / 02G094100.1	02G094100.1	18		ESL1
						cassava4.1_006521m / 18G023900.1	18G023900.1	18		ESL1
						cassava4.1_006595m / 05G071400.1	05G071400.1	18				ESL2a
						cassava4.1_007781m / 08G124100.1	08G124100.1	16								ESL3c
						cassava4.1_010998m		12							ESL3b
						cassava4.1_022554m / 08G124300.1	08G124300.1	18							ESL3b
						cassava4.1_023630m / 01G211700.1	01G211700.1	18				ESL2a
						cassava4.1_026688m / 09G162100.1	09G162100.1	15				ESL2a
						cassava4.1_033982m / 09G162500.1	09G162500.1	15						ESL3a
Medicago truncatula	Mt	V1.0	Phytozome V10.0	10	4	Medtr1g022315		17		ESL1
		Mt4.0v1				Medtr2g020710		18					ESL2b
						Medtr4g118610		18					ESL2b
						Medtr5g020270		18		ESL1
						Medtr7g094110		18				ESL2a
						Medtr7g094450		18				ESL2a
						Medtr7g113960		17						ESL3a
						Medtr7g113970		18						ESL3a
						Medtr8g077300		17		ESL1
						Medtr8g077310		18		ESL1
Mimulus guttatus	Mg	V2.0	Phytozome V10.0	6	0	Migut.B01284		18						ESL3a
						Migut.C00744		17		ESL1
						Migut.D01000		18				ESL2a
						Migut.G00231		17					ESL2b
						Migut.H00985		18		ESL1
						Migut.N00488		18		ESL1
Musa acuminata	Ma	V1	Aramemnon	5	0	GSMUA_Achr1T04760		17		ESL1
						GSMUA_Achr5T09100		17		ESL1
						GSMUA_Achr8T21810		18			ESL2
						GSMUA_Achr9T17450		18						ESL3a
						GSMUA_Achr10T01380		18			ESL2
Nelumbo nucifera	Nn		NCBI	8	4	gi|719973090|ref|XP_010279395.1	104613317	18					ESL2b
						gi|719996558|ref|XP_010254811.1	104595672	18		ESL1
						gi|720024476|ref|XP_010263644.1	104601854	18		ESL1
						gi|720082340|ref|XP_010242560.1	104586884	17				ESL2a
						gi|720082347|ref|XP_010242562.1	104586885	17				ESL2a
						gi|720082350|ref|XP_010242564.1	104586886	18				ESL2a
						gi|720082358|ref|XP_010242567.1	104586886	16						ESL3a
						gi|720088918|ref|XP_010244606.1	104588399	15					ESL2b
Oryza sativa	Os		Aramemnon	6	4	LOC_Os03g24860		18			ESL2
						LOC_Os03g24870		18			ESL2
						LOC_Os05g49260		17		ESL1
						LOC_Os05g49270		17		ESL1
						LOC_Os05g50280		17		ESL1
						LOC_Os11g42430		17			ESL2
Panicum hallii	Pha	V0.5	Phytozome V10.0	7	6	Pahal.0019s0177		17		ESL1
						Pahal.0019s0272		17		ESL1
						Pahal.0019s0273		17		ESL1
						Pahal.0068s0179		18						ESL3a
						Pahal.0068s0180		19						ESL3a
						Pahal.0073s0032		18			ESL2
						Pahal.0073s0033		18			ESL2
Panicum virgatum	Pvi	V1.1	Phytozome V10.0	12	6	Pavir.Ca00953		17		ESL1
						Pavir.Ca00954		14		ESL1
						Pavir.Ca00999		17		ESL1
						Pavir.Ea00876		18						ESL3a
						Pavir.Ea00877		18						ESL3a
						Pavir.Ia03316		18			ESL2
						Pavir.Ib01737		18			ESL2
						Pavir.Ib01738		18			ESL2
						Pavir.J02099		15			ESL2
						Pavir.J03292		17		ESL1
						Pavir.J04598		16		ESL1
						Pavir.J08880		17		ESL1
Phaseolus vulgaris	Pvu	V1.0	Phytozome V10.0	6	3	Phvul.001G147200		18				ESL2a
						Phvul.003G254100		18		ESL1
						Phvul.006G095200		18						ESL3a
						Phvul.006G095300		18						ESL3a
						Phvul.006G095600		18						ESL3a
						Phvul.006G159600		18					ESL2b
Phoenix dactylifera	Pd		NCBI	4	2	gi|672142517|ref|XP_008795112.1	LOC103710954	18			ESL2
						gi|672142521|ref|XP_008795114.1	LOC193710955	17						ESL3a
						gi|672161777|ref|XP_008800718.1		17		ESL1
						gi|672178065|ref|XP_008809152.1		15			ESL2
Physcomitrella patens	Ppa	V3.1	Phytozome V10.0	3	0	Phpat.008G091700	Pp3c8_25010	18		ESL1
		V3.3				Phpat.020G006100	Pp3c20_880	18		ESL1
						Phpat.024G076500	Pp3c24_20780	18		ESL1
Pinus taeda	Pita	V1.0	Congenie	9	2	PITA_000012987		15		ESL1
						PITA_000025047		19			ESL2
						PITA_000025048		18			ESL2
						PITA_000030243		14			ESL2
						PITA_000036192		16		ESL1
						PITA_000040871		16			ESL2
						PITA_000041810		18		ESL1
						PITA_000067896		16		ESL1
						PITA_000073858		15		ESL1
Populus trichocarpa	Ptr	V3.0	Aramemnon	11	5	Potri.002G212900		18				ESL2a
						Potri.002G259900		16		ESL1
						Potri.005G037000		18								ESL3c
						Potri.005G039900		18								ESL3c
						Potri.005G040000		18							ESL3b
						Potri.007G024300		18		ESL1
						Potri.010G026500		18					ESL2b
						Potri.013G027500		18						ESL3a
						Potri.013G027700		18								ESL3c
						Potri.013G027800		18								ESL3c
						Potri.014G136600		18				ESL2a
Prunus persica	Ppe	V2.1	Phytozome V10.0	6	4	ppa004636m / Prupe.1G144800		18					ESL2b
						ppa004911m / Prupe.1G378500		18		ESL1
						ppa004943m / Prupe.6G331800		18						ESL3a
						ppa005144m / Prupe.8G248700		18				ESL2a
						ppa016361m / Prupe.1G144900		18					ESL2b
						ppa018319m / Prupe.8G248500		18				ESL2a
Ricinus communis	Rc	V0.1	Phytozome V10.0	9	5	29634.m002113		18		ESL1
						29703.m001518		18				ESL2a
						29726.m003958		19					ESL2b
						30128.m008705		16				ESL2a
						30128.m008706		18								ESL3c
						30128.m008707		18								ESL3c
						30128.m008719		18						ESL3a
						30128.m008789		18						ESL3a
						30170.m014050		18		ESL1
Salix purpurea	Spu	V1.0	Phytozome V10.0	13	7	SapurV1A.0046s0020		18				ESL2a
						SapurV1A.0053s0400		18				ESL2a
						SapurV1A.0152s0380		18					ESL2b
						SapurV1A.0254s0210		18		ESL1
						SapurV1A.0353s0180		18								ESL3c
						SapurV1A.0353s0190		18								ESL3c
						SapurV1A.0353s0210		18						ESL3a
						SapurV1A.0418s0220		18		ESL1
						SapurV1A.0511s0010		12								ESL3c
						SapurV1A.0511s0020		18								ESL3c
						SapurV1A.0511s0030		18							ESL3b
						SapurV1A.0511s0040		17							ESL3b
						SapurV1A.0978s0120		18		ESL1
Selaginella moellendorffii	Sm	V1.0	Phytozome V10.0	2	0	Sm99846		17		ESL1
						Sm437958		15		ESL1
Setaria italica	Si	V2.1	Phytozome V10.0	7		Si001072m		17						ESL3a
						Si004653m		18						ESL3a
						Si021829m		17		ESL1
						Si021831m		17		ESL1
						Si021832m		17		ESL1
						Si035122m		18			ESL2
						Si035288m		18			ESL2
Solanum lycopersicum	Sl		Aramemnon	10	2	Solyc01g080680		16					ESL2b
						Solyc01g098490		18								ESL3c
						Solyc01g098500		18								ESL3c
						Solyc01g098560		18						ESL3a
						Solyc02g005180		16								ESL3c
						Solyc02g062750		18		ESL1
						Solyc02g085170		18		ESL1
						Solyc04g080460		18		ESL1
						Solyc09g074230		18				ESL2a
						Solyc12g089180		18		ESL1
Solanum tuberosum	St	V3.4	Phytozome V10.0	11	3	PGSC0003DMT400009273		19		ESL1
						PGSC0003DMT400009580		18		ESL1
						PGSC0003DMT400009830		18				ESL2a
						PGSC0003DMT400016079		16					ESL2b
						PGSC0003DMT400016988		18								ESL3c
						PGSC0003DMT400039972		18		ESL1
						PGSC0003DMT400040075		16		ESL1
						PGSC0003DMT400046976		16					ESL2b
						PGSC0003DMT400073530		18								ESL3c
						PGSC0003DMT400073532		18								ESL3c
						PGSC0003DMT400073537		17						ESL3a
Sorghum bicolor	Sb	V2.1	Phytozome V10.0	7	6	Sobic.001G362500		18			ESL2
						Sobic.001G362600		18			ESL2
						Sobic.003G110800		14						ESL3a
						Sobic.003G111000		18						ESL3a
						Sobic.009G235600		17		ESL1
						Sobic.009G235700		17		ESL1
						Sobic.009G243800		17		ESL1
Spirodela polyrhiza	Spo	V2.0	Phytozome V10.0	3	2	Spipo18G0038300		18		ESL1
						Spipo6G0008000		13			ESL2
						Spipo6G0008400		14			ESL2
Thellungiella halophila	Th	V1.0	Phytozome V10.0	16	9	Thhalv10004135m		18	Type 1							ESL3c
Eutrema salsugineum						Thhalv10007451m		18	Type 1							ESL3c
						Thhalv10007486m		17	Type 4	ESL1
						Thhalv10007539m		17	Type 7							ESL3c
						Thhalv10007580m		18	Type 1							ESL3c
						Thhalv10013389m		16	Type 9				ESL2b
						Thhalv10018460m		17	Type 3	ESL1
						Thhalv10020647m		17	Type 3						ESL3b
						Thhalv10020653m		17	Type 3						ESL3b
						Thhalv10020657m		17	Type 5							ESL3c
						Thhalv10020670m		18	Type 1							ESL3c
						Thhalv10020688m		17	Type 5							ESL3c
						Thhalv10022677m		17	Type 5			ESL2a
						Thhalv10023420m		18	Type 1							ESL3c
						Thhalv10028677m		16							ESL3b
						Thhalv10029321m		18	Type 1						ESL3b
Theobroma cacao	Tc	V1.1	Phytozome V10.0	10	5	Thecc1EG000373t1		19		ESL1
						Thecc1EG004484t1		18				ESL2a
						Thecc1EG004497t1		18					ESL2b
						Thecc1EG026514t1		18							ESL3b
						Thecc1EG026515t1		18							ESL3b
						Thecc1EG034049t1		18		ESL1
						Thecc1EG046780t1		18					ESL2b
						Thecc1EG046811t1		15							ESL3b
						Thecc1EG046814t1		18								ESL3c
						Thecc1EG046816t1		18						ESL3a
Vitis vinifera	Vv		Aramemnon	18	14	GSVIVG01009719001		18		ESL1
						GSVIVG01011047001		18				ESL2a
						GSVIVG01017836001		18					ESL2b
						GSVIVG01017844001		18			ESL2
						GSVIVG01017845001		18			ESL2
						GSVIVG01018949001		18		ESL1
						GSVIVG01022022001		19				ESL2a
						GSVIVG01022023001		20				ESL2a
						GSVIVG01022024001		18							ESL3b
						GSVIVG01022025001		11								ESL3c
						GSVIVG01022026001		17								ESL3c
						GSVIVG01022029001		18								ESL3c
						GSVIVG01022030001		18								ESL3c
						GSVIVG01022031001		18								ESL3c
						GSVIVG01022032001		18								ESL3c
						GSVIVG01022033001		18								ESL3c
						GSVIVG01022034001		19						ESL3a
						GSVIVG01022035001		18						ESL3a
Zea mays	Zm		Aramemnon	9	4	GRMZM2G077546		17		ESL1
						GRMZM2G097768		17		ESL1
						GRMZM2G098679		17		ESL1
						GRMZM2G109201		18			ESL2
						GRMZM2G109221		17			ESL2
						GRMZM2G134192		8						ESL3a
						GRMZM2G160430		17		ESL1
						GRMZM2G160460		17		ESL1
						GRMZM2G160504		17		ESL1
47				519	243	519				133	34	72	48	62	47	123
											154			232
										47	13	32	32	39	15	20
Species and sequences that have not been included in the phylogenetic analysis
Klebsormidium nitens	Kn	Hori K et al., 2014	PhycoCosm	1	0	rna-KFL_007450020		15
Sphagnum fallax	Sf	V0.5	Phytozome V10.0	1		Sf0160s0025.1
Trifolium pratense	T	V2.0	Phytozome V10.0	4
Marchantia polymorpha	Mp	V3.1	Phytozome V10.0	2		Mp29s0046.6
Chlamydomonas reinardtii	Cre	V5.5	Phytozome V10.0	0
Chlorella vulgaris	Cv		NCBI	0
Chondrus crispus	Ccr		NCBI	0
Coccomyxa subellipsoidea	Csu	V2.0	Phytozome V10.0	0
Cyanidioschyzon merolae	Cme		NCBI	0
Ectocarpus siliculosus	Es		NCBI	0
Galderia sulphuraria	Gs		NCBI	0
Micromonas pusilla	Mp	V3.0	Phytozome V10.0	0
Ostreococcus lucimarinus	Ol	V2.0	Phytozome V10.0	0
Pyropia yezoensis	Py		NCBI	0
Volvox carteri	Vc	V2.0	Phytozome V10.0	0
