# Supplementary material for: Early Response to Dehydration Six-Like Transporter Family: Early Origin in Streptophytes and Evolution in Land Plants
Source: Frontiers journal article supplement (doi:10.3389/fpls.2021.681929), 2021-09-06
Supplement: Data_Sheet_2.zip [file Data_Sheet_2.zip]

**SUPPLEMENTARY Table 2 :**  
**Primers used for the expression analysis of *AtESL* par qRT-PCR.**

| Genes            | Sequences                   | Tm (°C) | Length (nt) | Taille de l'amplicon (bp) | Efficacité | Observations           |
|------------------|-----------------------------|---------|-------------|---------------------------|------------|------------------------|
| <i>At1g19450</i> | F : TAAGCCTCGTGATTGTAGCA    | 58      | 20          | 121                       | 90         | -                      |
|                  | R : CAAGAAATAACCATAGCCACA   | 58      | 21          |                           |            |                        |
| <i>At1g75220</i> | F : GTGGAGGAACTTTCACCTGTGA  | 64      | 22          | 99                        | 90         | -                      |
|                  | R : GTTCTTCAAGAGTTTTCGCCTT  | 58      | 21          |                           |            |                        |
| <i>At2g48020</i> | F : CTGAGATATTTCCCATAAACAT  | 58      | 21          | 139                       | 93         | -                      |
|                  | R : AAGATTGCAATTTATGTCCCAG  | 58      | 21          |                           |            |                        |
| <i>At3g05150</i> | F : TTCTTTTGAAGGCTCATGGTT   | 58      | 21          | 200                       | -          | -                      |
|                  | R : GACAAGCCATGAACTTAGCCA   | 62      | 19          |                           |            |                        |
| <i>At5g18840</i> | F : CTGAGATATTTCCGATAAACGTA | 62      | 23          | 177                       | 114        | -                      |
|                  | R : TCTTCGCCACAAATATTATCGTC | 64      | 23          |                           |            |                        |
| <i>At1g54730</i> | F : AATCCGGCAGGAACGTTTATATG | 64      | 22          | 179                       | 100        | -                      |
|                  | R : CGTTATAATTAGGGACTGATAT  | 58      | 22          |                           |            |                        |
| <i>At4g04750</i> | F : TACAGGAACGTTTATGATGTTT  | 58      | 22          | 203                       | 90         | -                      |
|                  | R : CATGAAATATAAAGAGATCTGA  | 56      | 22          |                           |            |                        |
| <i>At4g04760</i> | F : CAGAGATTATCCAGTAGATGT   | 60      | 22          | 174                       | 100        | -                      |
|                  | R : TGGCTATGAACACAAATCCAA   | 58      | 21          |                           |            |                        |
| <i>At3g05400</i> | F : CTTCTTATGACTTCAGCGTTGG  | 64      | 22          | 148                       | 100        | -                      |
|                  | R : CAATTGCGAACATCATCGT     | 54      | 19          |                           |            |                        |
| <i>At1g08890</i> | F : TGGAGTGCTTTCGGAACATATT  | 60      | 22          | 150                       | 109        | -                      |
|                  | R : GAGTAAAGAATCACTTTGGAT   | 58      | 22          |                           |            |                        |
| <i>At1g08900</i> | F : GTAGCCTTGTAACGATGTCA    | 58      | 20          | 99                        | 97         | -                      |
|                  | R : ATATGAAATATGTTCCGGAAGC  | 60      | 22          |                           |            |                        |
| <i>At3g20460</i> | F : ACGCTATGCAATTTAACTAGCTG | 64      | 23          | 89                        | 97         | -                      |
|                  | R : AACACACCAGAAGAGCTCCACT  | 66      | 22          |                           |            |                        |
| <i>At1g08920</i> | F : TCGGTCTCATTCCATGTGCG    | 62      | 20          | 131                       | 97         | -                      |
|                  | R : TGCATCATCTCCGCGAAGAC    | 62      | 20          |                           |            |                        |
| <i>At1g08930</i> | F : ATAATGGCTGAGATATTTCCG   | 58      | 21          | 176                       | 95         | -                      |
|                  | R : ATAAATACGATCGAACTGGC    | 60      | 20          |                           |            |                        |
| <i>At3g05155</i> | F : GTGGTACCAAAAGCTATATTGG  | 62      | 22          | 164                       | -          | No amplification       |
|                  | R : CCGATGCCTGCAAATTTGTACA  | 64      | 22          |                           |            |                        |
| <i>At3g05160</i> | F : GCACAAGGAACCTTTTACATAT  | 60      | 22          | 101                       | 90         | -                      |
|                  | R : AATTCTTCAAGCGACTGTCC    | 58      | 20          |                           |            |                        |
| <i>At3g05165</i> | F : AAGGAACATTTTACATATTTGC  | 56      | 22          | 167                       | -          | Not enough specificity |
|                  | R : TTTATTATTGCAATGCGACT    | 54      | 21          |                           |            |                        |
| <i>At5g27350</i> | F : TATGTCGGAGATATTTCCAATA  | 58      | 22          | 269                       | 97         | -                      |
|                  | R : CAAATTAAGTTTGATTCTTTTC  | 54      | 22          |                           |            |                        |
| <i>At5g27360</i> | F : AGTGGAGCACTCAAGGAACATT  | 64      | 22          | 149                       | 95         | -                      |
|                  | R : TTGATTATTCTATCGGGCTC    | 60      | 22          |                           |            |                        |
